# Supplementary material for: 昭和・平成の大合併に関する研究と課題 (共通テーマ 平成の市町村合併と農山漁村)
Source: Royal Society of Chemistry journal article supplement (doi:10.1039/c4sm01578a), 2013-10-01
Supplement: c4sm01578a1.pdf [file c4sm01578a1.pdf]

Electronic Supplementary Information (ESI)

## **Controlled Silica Deposition on Self-assembled Peptide Nanostructures via Varying Molecular Structures of Short Amphiphilic Peptides**

Shengjie Wang,<sup>a</sup> Junyi Xue,<sup>a</sup> Yurong Zhao,<sup>a</sup> Mingxuan Du,<sup>a</sup> Li Deng,<sup>a</sup> Hai Xu<sup>\*a</sup> and Jian R. Lu<sup>b</sup>

<sup>a</sup> Center for Bioengineering and Biotechnology, China University of Petroleum (East China), Qingdao 266580, P.  
R. of China.

<sup>b</sup> Biological Physics Group, School of Physics and Astronomy, University of Manchester, Schuster Building,  
Manchester M139JP, UK.

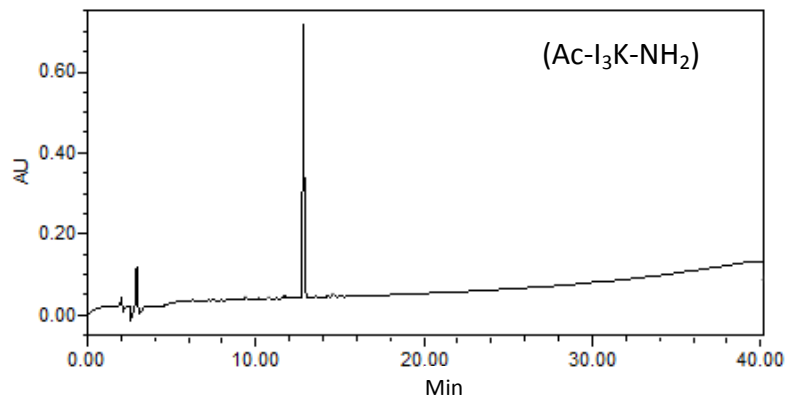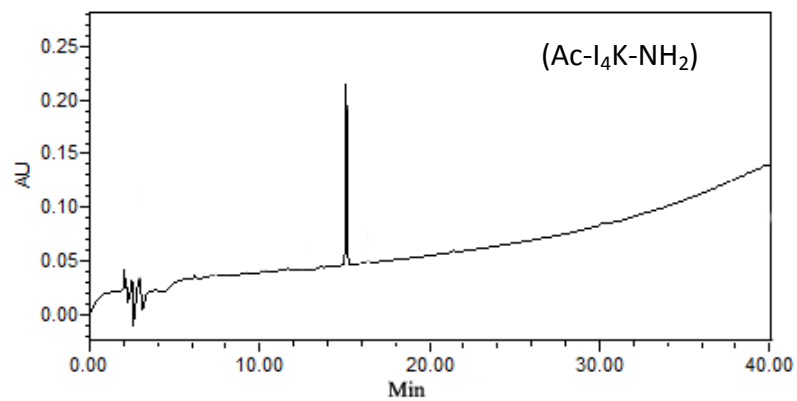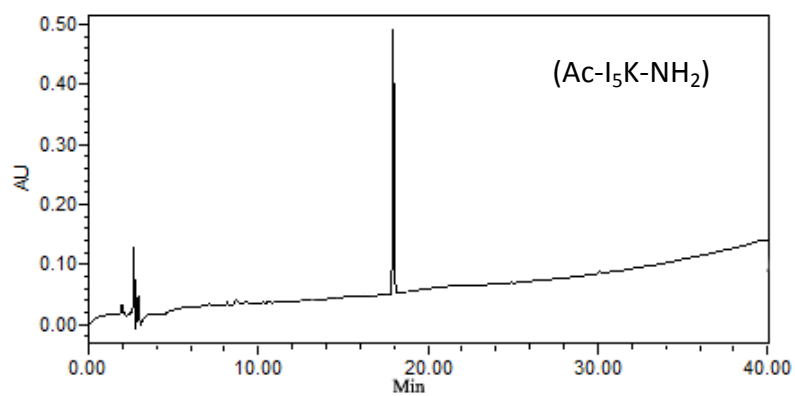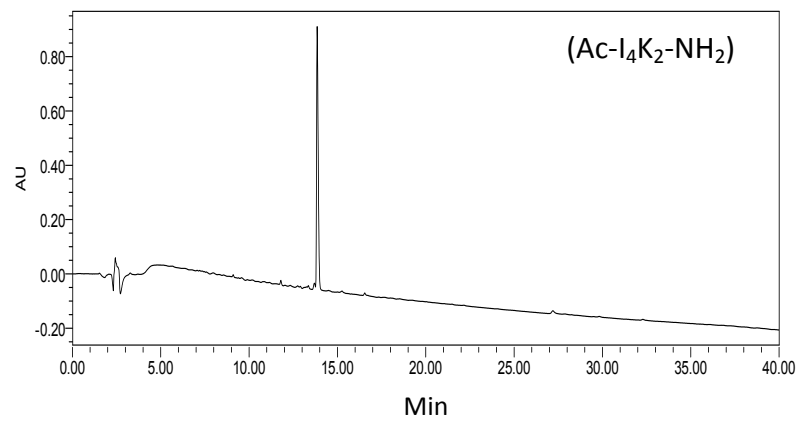

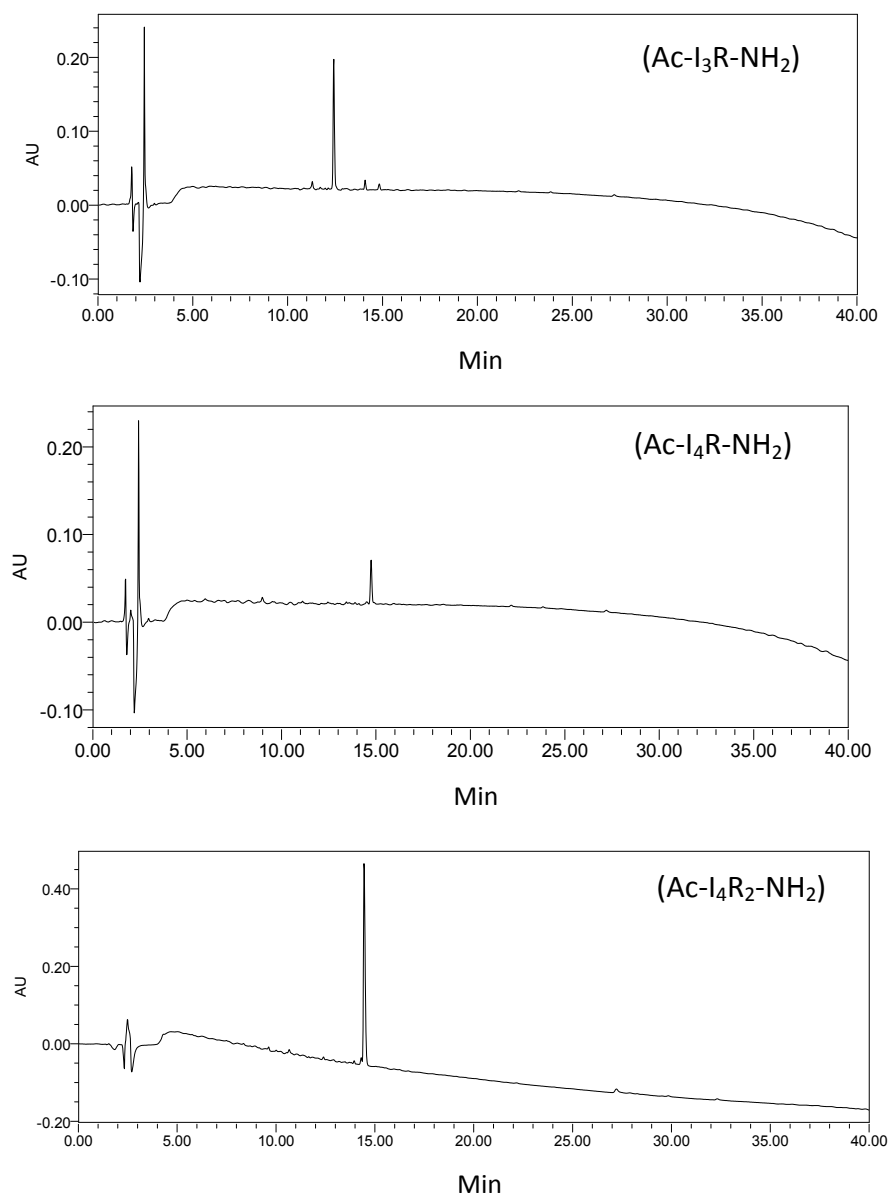

**Fig. S1** HPLC profiles of the synthesized short peptides. The experimental condition for the HPLC analysis is as follows: eluent A, 0.1% TFA in water, 0→1 min, 95%, 1→40 min, 95%→5%, 40→45 min, 5%→95%; eluent B, 0.1% TFA in acetonitrile, 0→1 min, 5%, 1→40 min, 5%→95%, 40→45 min, 95%→5%. UV, 214 nm; flow rate, 0.6 ml/min; column, RP-C18, 4.6 mm×150 mm. The measurements were performed on Waters 2695 Alliance HPLC system at temperature of 25 °C. The profiles indicate high purity with the seven peptides.

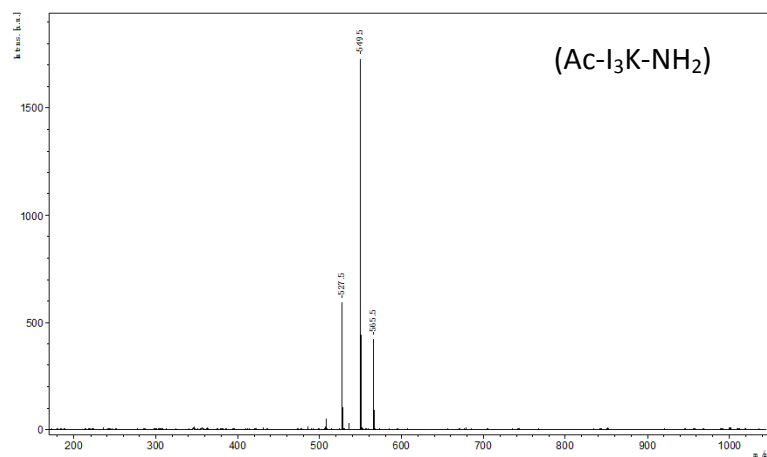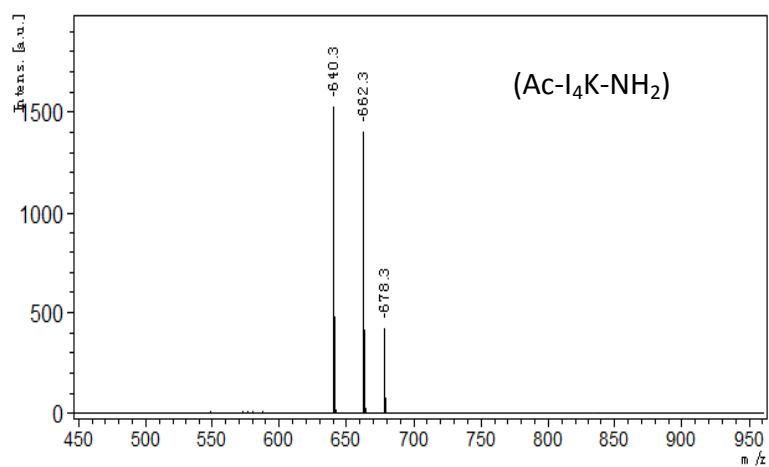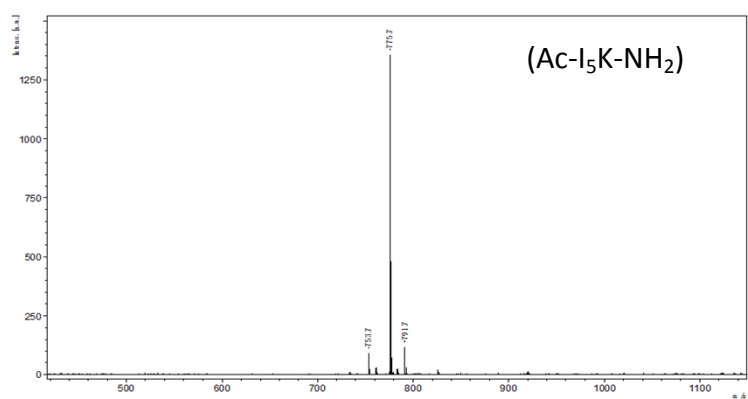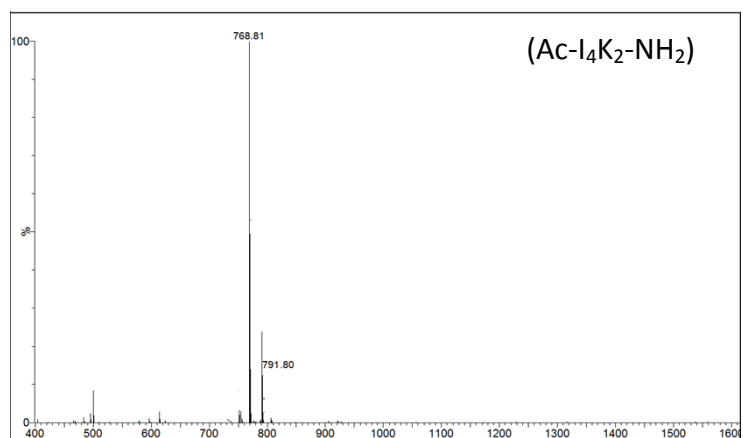

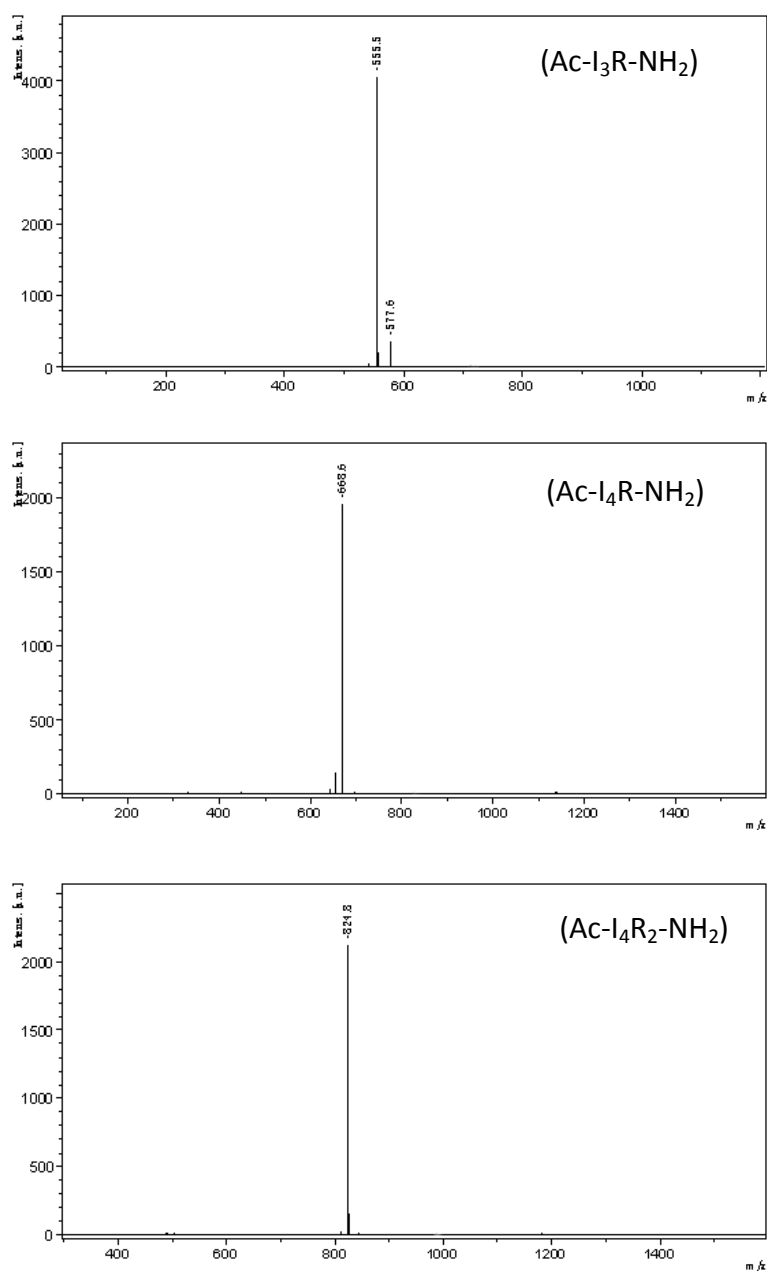

**Fig. S2** MS spectra of the synthesized short peptides. The MS measurements were carried out on a Bruker Biflex III matrix assisted laser desorption/ionization time of flight (MALDI-TOF) mass spectrometer equipped with a 337 nm nitrogen laser and 4-hydroxy- $\alpha$ -cyanocinnamic acid was used as the matrix. The samples were dissolved with the matrix in the mixture of acetonitrile and water (1:1, v/v) which contained 1% trifluoroacetic acid (TFA). About 0.5  $\mu$ l of the sample solution was placed on a metal sample plate and then allowed to air-dry at ambient temperature. Mass spectra were acquired in positive linear mode and using an acceleration voltage of 19 kV. External mass

calibration was performed using a standard peptide mixture. Spectra were obtained by setting the laser power close to the threshold of ionization and generally 100 pulses were acquired and averaged.

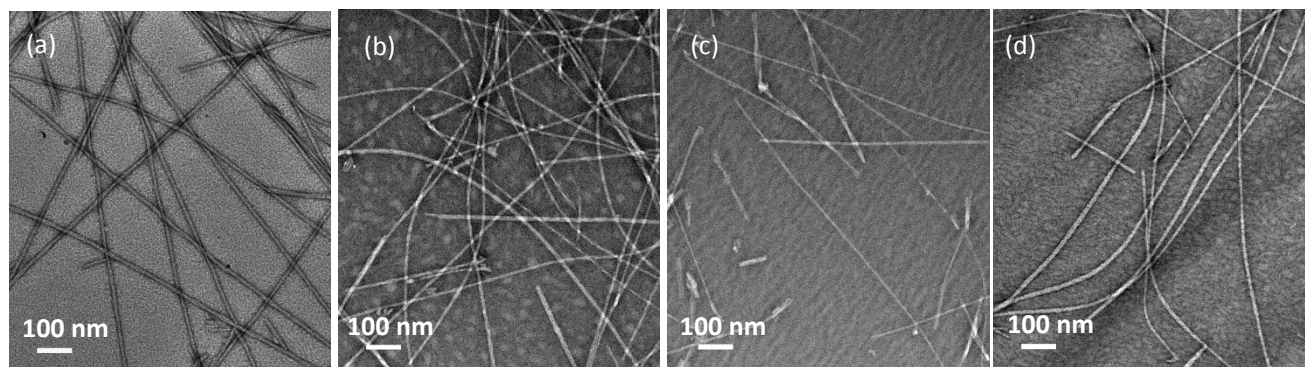

**Fig. S3** TEM images of (a) I<sub>3</sub>K, (b) I<sub>4</sub>K, (c) I<sub>5</sub>K, and (d) I<sub>4</sub>K<sub>2</sub> self-assemblies in aqueous solution (pH 7.0).

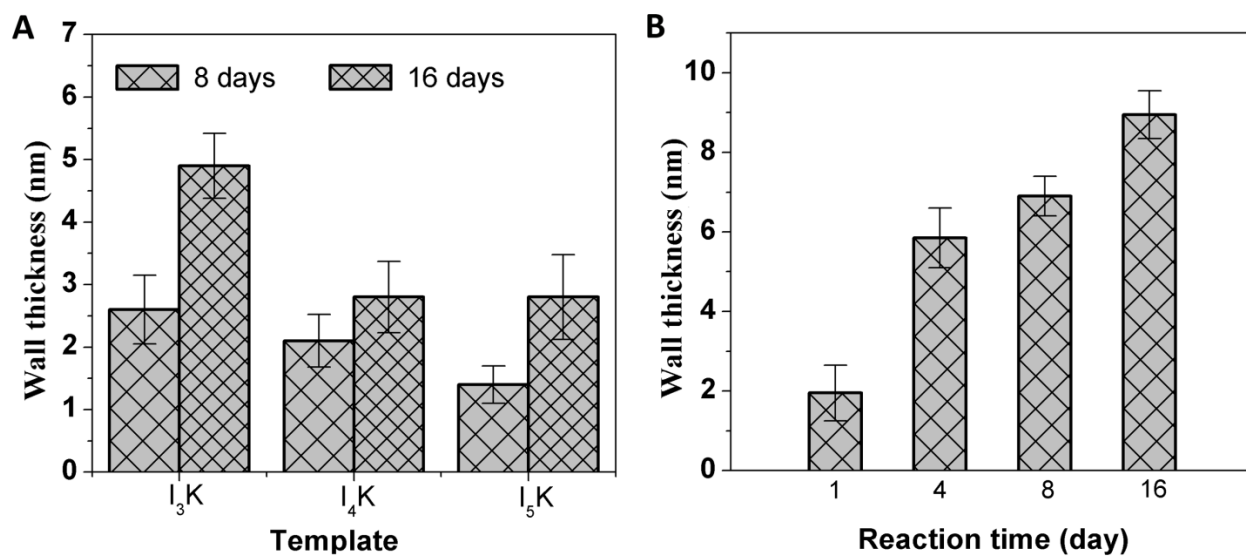

**Fig. S4** The wall thickness of the silica nanotubes template by the peptide assemblies.

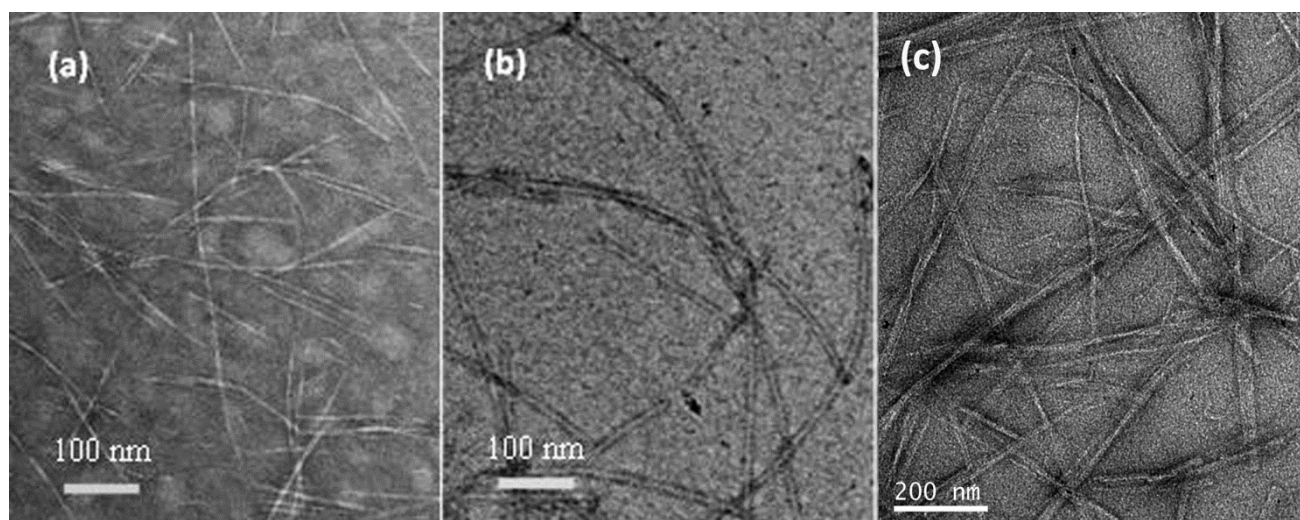

**Fig. S5** TEM images of (a)  $I_3R$ , (b)  $I_4R$ , and (c)  $I_4R_2$  self-assemblies in aqueous solution (pH 7.0).

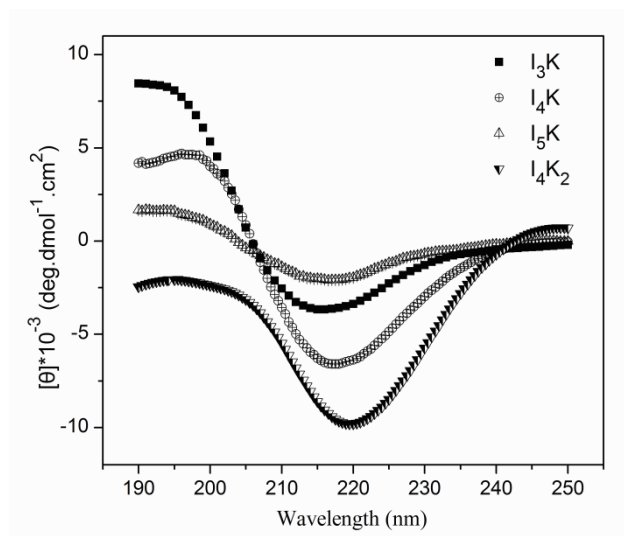

**Fig. S6** CD spectra of  $I_3K$ ,  $I_4K$ ,  $I_5K$  and  $I_4K_2$  at a concentration of 1.0 mM in aqueous solution (pH 7.0).

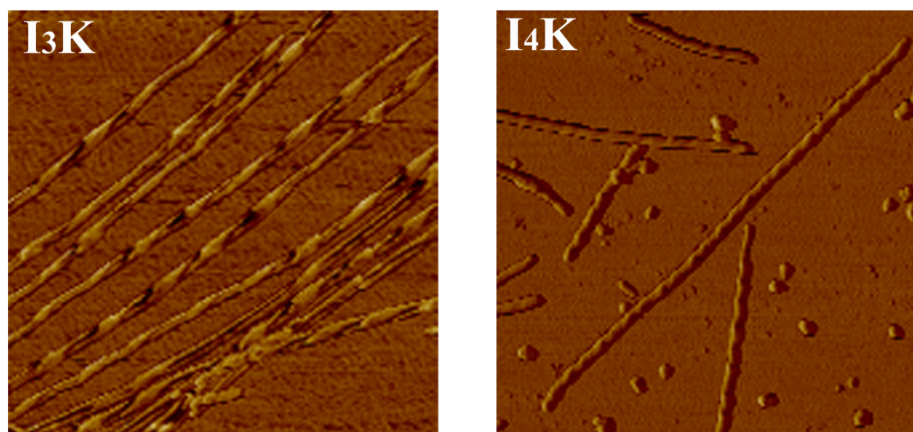

**Fig. S7** AFM phase images of I<sub>3</sub>K and I<sub>4</sub>K nanofibrils.

**Table S1** The main fitting parameters for the SANS curves as shown in Fig. 5.

| Peptides           | I <sub>3</sub> K    | I <sub>4</sub> K   | I <sub>4</sub> K <sub>2</sub> |
|--------------------|---------------------|--------------------|-------------------------------|
| Fitting Models     | HollowCylinderModel | FlexCylEllipXModel | FlexCylEllipXModel            |
| <b>Parameters:</b> |                     |                    |                               |
| axis ratio         | /                   | 3                  | 4                             |
| core               | 10-20 Å             | /                  | /                             |
| radius             | 40-45 Å             | 27 Å               | 14 Å                          |
| length             | >1000 Å             | >1000 Å            | >1000 Å                       |
| sldCyl             | 3e-06               | 3e-06              | 4e-06                         |
| sldSlov            | 6.21e-06            | 6.21e-06           | 6.21e-06                      |
